# Supplementary material for: Iron Status Affects the Zinc Accumulation in the Biomass Plant Szarvasi-1
Source: MDPI journal article supplement (doi:10.3390/plants11233227), 2022-11-25
Supplement: s1 [file s1]

## Iron status affects the Zinc accumulation in the biomass plant Szarvasi-1

Flóra Kolberg, Brigitta Tóth, Deepali Rana, Vitor Arcoverde Cerveira Sterner, Anita Gerényi, Ádám Solti, Imre Szalóki, Gyula Sipos and Ferenc Fodor

### Supplementary figures:

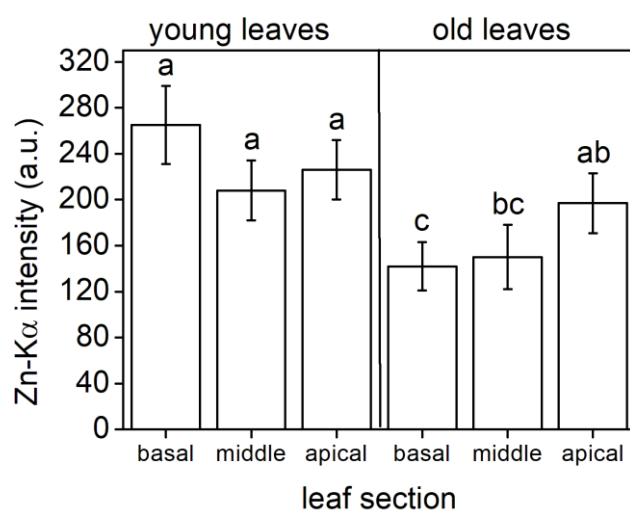

**Supplementary Figure S1.** Localization of Zn in the young (developing) and old leaves of 50-day-old Szarvasi-1 energy grass grown in nutrient solution amended with 0.5 mM Zn for 2 weeks. The measurements were made by a microXRF instrument (Horiba, Japan). To compare differences among the treatments, one-way ANOVA was performed with Tukey-Kramer multiple comparisons *post hoc* test ( $p < 0.05$ ,  $n = 3$ ). Statistically different values are indicated by different letters. Error bars represent SD values.

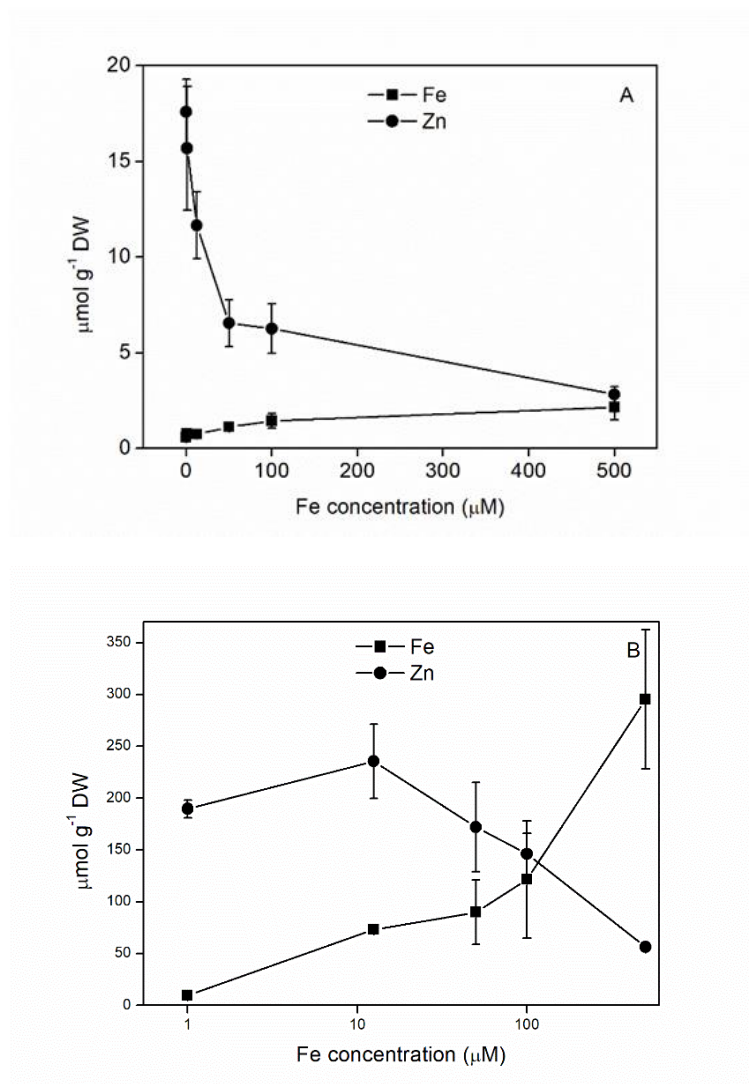

**Supplementary Figure S2.** Fe and Zn concentration in the shoots (A) and roots (B) of 28-day-old Szarvasi-1 energy grass pre-grown for two weeks in nutrient solution containing 0-500  $\mu\text{M}$  Fe then spiked with 100  $\mu\text{M}$  Zn for an additional week ( $n = 3$ , mean  $\pm$  SD).

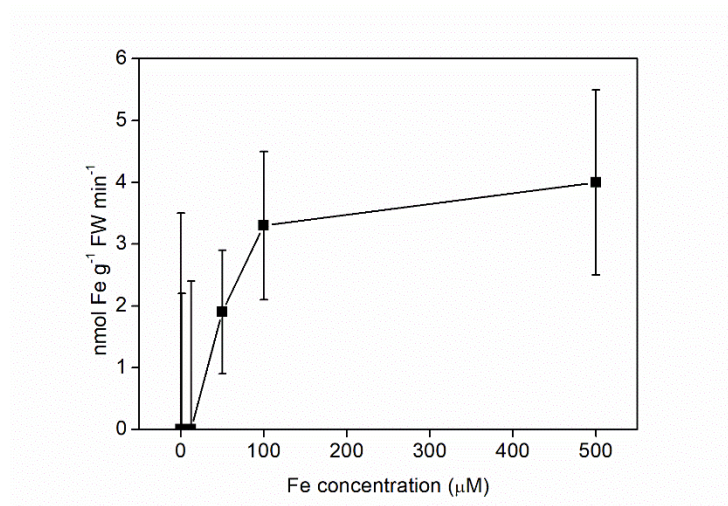

**Supplementary Figure S3.** Ferric chelate reductase activity of the root tips of 28-day-old Szarvasi-1 energy grass pre-grown for two weeks in nutrient solution containing 0-500  $\mu\text{M}$  Fe then spiked with 100  $\mu\text{M}$  Zn for an additional week ( $n = 3$ , mean  $\pm$  SD).
